# Supplementary material
Source: ML conference proceedings conference paper supplement (https://proceedings.neurips.cc/paper_files/paper/2018/hash/67d16d00201083a2b118dd5128dd6f59-Abstract.html)
Supplement: Supplementary file [file 67d16d00201083a2b118dd5128dd6f59-Supplemental.zip]

---

# Supplementary Material: Neural Guided Constraint Logic Programming for Program Synthesis

---

## A Relational Interpreter

We include below the code for the relational interpreter, written in miniKanren. For readability by machine learning audience, our main paper renames the inputs to the relational interpreter: `expr` or expression is called `P` or *program* in the main paper, `env` or environment is called `I` or *input*, and `value` is called `O` or *output*.

```
(define-relation (evalo expr env value)
  (conde
    ;; conde creates a disjunction
    ((fresh (body)
      ;; fresh creates new variables and a conjunction
      (== '(lambda ,body) expr)
      ;; expr is a lambda definition
      (== '(closure ,body ,env) value)))
    ((== '(quote ,value) expr)
     ;; expr is a literal constant
     (fresh (a*)
      (== '(list . ,a*) expr)
      ;; expr is a list construction
      (evalo-listo a* env value)))
    ((fresh (index)
      (== '(var ,index) expr)
      ;; expr is a variable
      (lookupo index env value)))
    ((fresh (rator rand arg env^ body)
      (== '(app ,rator ,rand) expr)
      ;; expr is a function application
      (evalo rator env '(closure ,body ,env^))
      (evalo rand env arg)
      (evalo body '(,arg . ,env^) value)))
    ((fresh (a d va vd)
      (== '(cons ,a ,d) expr)
      ;; expr is a cons operation
      (== '(,va . ,vd) value)
      (evalo a env va)
      (evalo d env vd)))
    ((fresh (c vd)
      (== '(car ,c) expr)
      ;; expr is a car operation
      (evalo c env '(,value . ,vd))))
    ((fresh (c va)
      (== '(cdr ,c) expr)
      ;; expr is a cdr operation
      (evalo c env '(,va . ,value))))))
```

## B Example Generated Problems

Some examples of automatically generated problems are shown in Table A1. Variables in a function body are encoded using de Bruijn indices, so that (var ()) is looking up the 0th (and only) variable. The symbol . denotes a pair.

Table A1: Sample auto-generated training problems

|                                                                      |  |                  |
|----------------------------------------------------------------------|--|------------------|
| Program: (LAMBDA (CAR (CAR (VAR ())))))                              |  |                  |
| Input                                                                |  | Output           |
| ((b . #t))                                                           |  | b                |
| ((() . b) . a)                                                       |  | ()               |
| ((a . s) . 1)                                                        |  | a                |
| ((y . 1)) . 1)                                                       |  | (y . 1)          |
| ((b))                                                                |  | b                |
| Program: (LAMBDA (CONS (CAR (VAR ())) (QUOTE X)))                    |  |                  |
| Input                                                                |  | Output           |
| (a)                                                                  |  | (a . x)          |
| (#t . s)                                                             |  | (#t . x)         |
| ((1 . y) . y)                                                        |  | ((1 . y) . x)    |
| ((y 1 . s) . 1)                                                      |  | ((y 1 . s) . x)  |
| ((x . x)) . y)                                                       |  | ((x . x)) . x)   |
| Program: (LAMBDA (QUOTE X))                                          |  |                  |
| Input                                                                |  | Output           |
| y                                                                    |  | x                |
| ()                                                                   |  | x                |
| #t                                                                   |  | x                |
| a                                                                    |  | x                |
| b                                                                    |  | x                |
| Program: (LAMBDA (CONS (CAR (VAR ())) (CAR (CAR (CDR (VAR ()))))))   |  |                  |
| Input                                                                |  | Output           |
| (y (y . b) . y)                                                      |  | (y . y)          |
| (x (1 . 1))                                                          |  | (x . 1)          |
| (x ((y . a) . x) . a)                                                |  | (x y . a)        |
| ((#f . #t) (#f . a) . 1)                                             |  | ((#f . #t) . #f) |
| (a ((y #f . #f) . 1) . a)                                            |  | (a y #f . #f)    |
| Program: (LAMBDA (CAR (CDR (CAR (CAR (CDR (CDR (CDR (VAR ()))))))))) |  |                  |
| Input                                                                |  | Output           |
| (#f a () ((#f b . 1) . y) . #t)                                      |  | b                |
| (x #t y (((() (#t . a) . s))))                                       |  | (#t . a)         |
| (x b s ((#f (s 1 . b) . y)) . s)                                     |  | (s 1 . b)        |
| (b () #f ((b ((x . #t) . x))) . a)                                   |  | ((x . #t) . x)   |
| (1 #t a ((s (1 #t s . a) . x) . #t) . #t)                            |  | (1 #t s . a)     |

## C Problems where Neural Guided Synthesis Fails

Table A2 lists problems on which the methods failed. The single problem that RNN + Constraints failed to solve is a fairly complex problem. The problems that the GNN + Constraints failed to solve all include a complex list accessor portion. This actually makes sense: it is conceivable for multi-layer RNNs to be better at this kind of problem compared to a single-layer GNN. The RNN without constraints also fails at complex list accessor problems.

Table A2: Problems where Neural Guided Synthesis Fails

| Method               | Problem                                                                                                                                                                                                                                                                                                                                                                                                                                                                                                                                                                                                                                                                                                                 |
|----------------------|-------------------------------------------------------------------------------------------------------------------------------------------------------------------------------------------------------------------------------------------------------------------------------------------------------------------------------------------------------------------------------------------------------------------------------------------------------------------------------------------------------------------------------------------------------------------------------------------------------------------------------------------------------------------------------------------------------------------------|
| RNN + Constraints    | (lambda (cons (cons (var ()) (var ())) (cons (var ()) (car (cdr (var ()))))))                                                                                                                                                                                                                                                                                                                                                                                                                                                                                                                                                                                                                                           |
| GNN + Constraints    | (lambda (car (car (car (car (cdr (cdr (car (var ())))))))))<br>(lambda (car (car (car (cdr (car (cdr (car (var ())))))))))<br>(lambda (car (car (car (cdr (cdr (cdr (car (var ())))))))))<br>(lambda (car (car (cdr (car (car (var ())))))))<br>(lambda (car (car (cdr (car (cdr (cdr (car (var ())))))))))<br>(lambda (car (car (cdr (cdr (cdr (cdr (car (var ())))))))))<br>(lambda (car (cdr (car (car (cdr (var ())))))))<br>(lambda (car (cdr (car (cdr (cdr (car (var ())))))))<br>(lambda (car (cdr (cdr (car (car (cdr (var ())))))))<br>(lambda (car (cdr (cdr (cdr (cdr (car (car (var ())))))))))<br>(lambda (car (cdr (cdr (cdr (cdr (car (cdr (var ())))))))))<br>(lambda (cdr (cdr (car (car (var ()))))) |
| RNN (No Constraints) | (lambda (cons (car (var ())) (cons (var ()) (cdr (car (var ())))))<br>(lambda (cdr (car (car (cdr (car (cdr (var ())))))))<br>(lambda (cdr (car (cdr (car (car (car (var ())))))))<br>(lambda (cdr (car (car (car (car (car (var ())))))))<br>(lambda (cdr (car (car (cdr (car (cdr (var ())))))))<br>(lambda (cdr (car (cdr (car (car (car (var ())))))))<br>(lambda (cdr (car (car (car (car (car (var ())))))))                                                                                                                                                                                                                                                                                                      |

## D RobustFill Results for Various Beam Sizes

To compare against RobustFill, we use a flattened representation of the problems shown in Section B, and use the Attention-C model with various beam sizes. For a beam size  $k$ , if any of the top- $k$  generated programs are correct, we consider the synthesis a success. We report several figures in Table A3: column (a) shows the percent of test problems held out from training that were successfully solved (Table 2 in our paper), and column (b) shows the largest  $N$  for a family of synthesis problems for which synthesis succeeds (Table 3 in our paper).

Table A3: RobustFill Results

| Model                           | (a) Test | (b) Generalization |             |                 |
|---------------------------------|----------|--------------------|-------------|-----------------|
|                                 | % Solved | Repeat(N)          | DropLast(N) | BringToFront(N) |
| RobustFill, Beam Size 1         | 56%      | 0                  | 0           | 0               |
| RobustFill, Beam Size 10        | 94%      | 0                  | 0           | 0               |
| RobustFill, Beam Size 100       | 99%      | 1                  | 0           | 0               |
| RobustFill, Beam Size 1000      | 100%     | 1                  | 1           | 0               |
| RobustFill, Beam Size 5000      | 100%     | 3                  | 1           | 0               |
| RNN-Guided + Constraints (Ours) | 99%      | 20+                | 6           | 5               |
